# Supplementary material for: On the Structural and Molecular Properties of PEO and PEO-PPG Functionalized Chitosan Nanoparticles for Drug Delivery
Source: MDPI journal article supplement (doi:10.3390/bioengineering11040372), 2024-04-12
Supplement: s1 [file s1]

## Supplementary Information

### On the Structural and Molecular Properties of PEO and PEO-PPG Functionalized Chitosan Nanoparticles for Drug Delivery

Rejeena Jha <sup>1</sup>, Hyrum Harlow <sup>1</sup>, Mourad Benamara <sup>2</sup>, Robert A. Mayanovic <sup>1\*</sup>

<sup>1</sup> Department of Physics, Astronomy, and Materials Science, Missouri State University,

Springfield, MO 65804, USA; [rj23s@login.missouristate.edu](mailto:rj23s@login.missouristate.edu) (R.J.); [hih55s@missouristate.edu](mailto:hih55s@missouristate.edu) (H.H.)

<sup>2</sup> University of Arkansas Nano-Bio Materials Characterization Facility, University of Arkansas, Fayetteville, AR 72701, USA; [mourad@uark.edu](mailto:mourad@uark.edu)

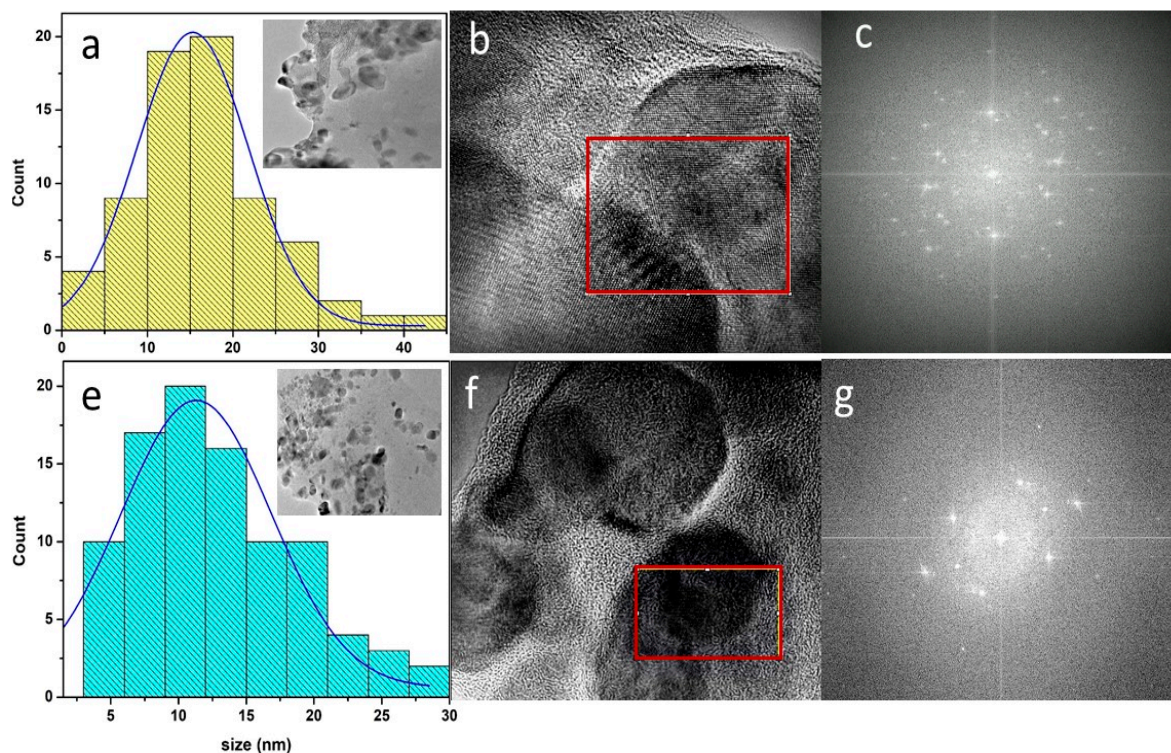

Figure S1. (a) Size distribution histogram calculated from TEM data (inset shows a TEM image), (b) a HRTEM image and (c) a FFT of the region delineated by the rectangle shown in (b) of sample CNP-0.5%; (d) size distribution histogram and a corresponding a TEM image shown in the inset, (e) a HRTEM image and (f) a FFT of the region outlined by the rectangle in e) of sample 1% CNP-PEO.

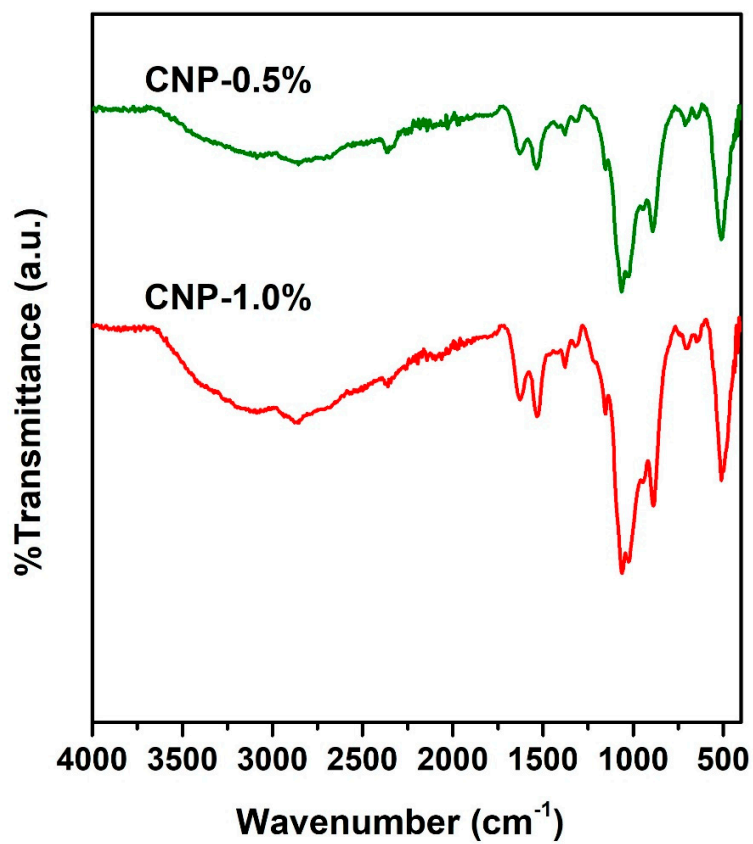

Figure S2. FTIR spectra measured from the CNP-1.0% and CNP-0.5% samples indicating negligible concentration dependence.
